# Supplementary material for: Meteorological variables and mosquito monitoring are good predictors for infestation trends of Aedes aegypti, the vector of dengue, chikungunya and Zika
Source: PubMed Central journal article supplement (PMC5307865; doi:10.1186/s13071-017-2025-8), 2017-02-13
Supplement: 13071_2017_2025_MOESM1_ESM.pdf [file 13071_2017_2025_MOESM1_ESM.pdf]

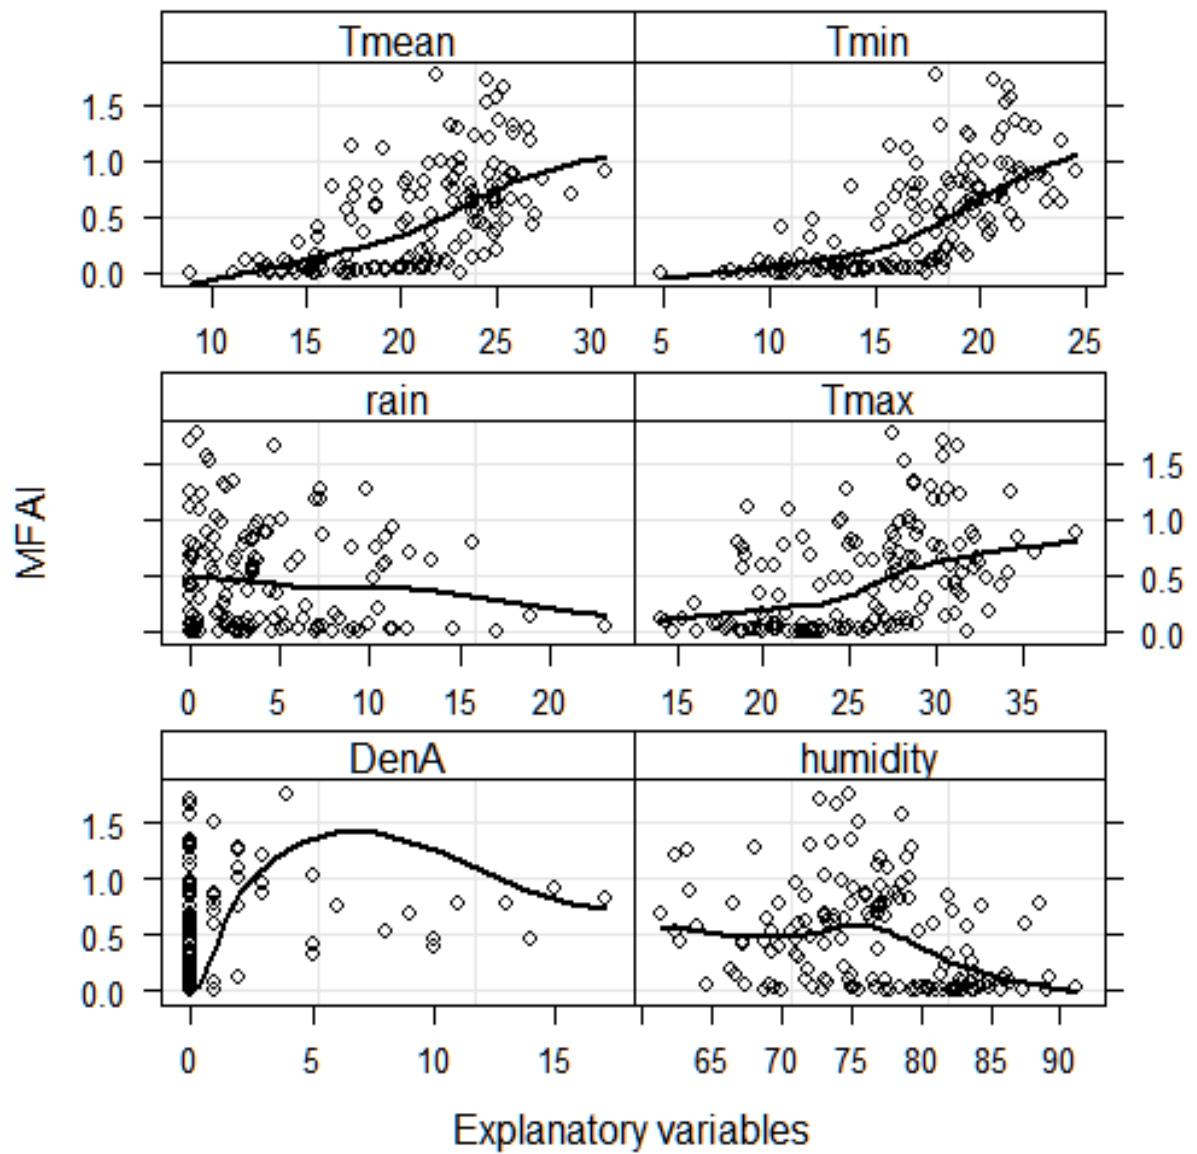

**Figure S1:** Scatterplots of the MFAI (mean number of *Ae. aegypti* females) against each of the explanatory variables. A smoothing (LOESS) curve was added in each panel.
