# Supplementary material for: Meteorological variables and mosquito monitoring are good predictors for infestation trends of Aedes aegypti, the vector of dengue, chikungunya and Zika
Source: PubMed Central journal article supplement (PMC5307865; doi:10.1186/s13071-017-2025-8), 2017-02-13
Supplement: 13071_2017_2025_MOESM2_ESM.pdf [file 13071_2017_2025_MOESM2_ESM.pdf]

**Table S1: Comparison of AICs of models with variables and varying time lags**

Formula: gam(Aaefem~offset(LNtraps)+s(variable), family=nb())

| <b>Model</b>                                                | <b>Variable</b>                | <b>Estimate</b> | <b>Standard Error</b> | <b>Chi.sq</b> | <b>p-value</b> | <b>AIC</b> |
|-------------------------------------------------------------|--------------------------------|-----------------|-----------------------|---------------|----------------|------------|
| <b>Models with variable explanatory Temperature minimum</b> |                                |                 |                       |               |                |            |
| Tmin                                                        | <i>Intercept</i>               | -1.15           | 0.08                  |               | <0.001         | 1857       |
|                                                             | <i>s (Tmin)</i>                | Smooth          |                       | 151.5         | <0.001         |            |
| Tmin1                                                       | <i>Intercept</i>               | -1.23           | 0.08                  |               | <0.001         | 1832       |
|                                                             | <i>s (Tmin<sub>t-1</sub>)</i>  | Smooth          |                       | 217.9         | <0.001         |            |
| Tmin2                                                       | <i>Intercept</i>               | -1.29           | 0.07                  |               | <0.001         | 1814       |
|                                                             | <i>s (Tmin<sub>t-2</sub>)</i>  | Smooth          |                       | 275.3         | <0.001         |            |
| Tmin3                                                       | <i>Intercept</i>               | -1.34           | 0.07                  |               | <0.001         | 1798       |
|                                                             | <i>s (Tmin<sub>t-3</sub>)</i>  | Smooth          |                       | 323.5         | <0.001         |            |
| Tmin4                                                       | <i>Intercept</i>               | -1.42           | 0.06                  |               | <0.001         | 1764       |
|                                                             | <i>s (Tmin<sub>t-4</sub>)</i>  | Smooth          |                       | 463.4         | <0.001         |            |
| <b>Models with variable explanatory Temperature mean</b>    |                                |                 |                       |               |                |            |
| Tmean                                                       | <i>Intercept</i>               | -1.07           | 0.09                  |               | <0.001         | 1879       |
|                                                             | <i>s (Tmean)</i>               | Smooth          |                       | 106           | <0.001         |            |
| Tmean1                                                      | <i>Intercept</i>               | -1.16           | 0.08                  |               | <0.001         | 1854       |
|                                                             | <i>s (Tmean<sub>t-1</sub>)</i> | Smooth          |                       | 162.7         | <0.001         |            |
| Tmean2                                                      | <i>Intercept</i>               | -1.23           | 0.08                  |               | <0.001         | 1835       |
|                                                             | <i>s (Tmean<sub>t-2</sub>)</i> | Smooth          |                       | 218.4         | <0.001         |            |
| Tmean3                                                      | <i>Intercept</i>               | -1.30           | 0.07                  |               | <0.001         | 1810       |
|                                                             | <i>s (Tmean<sub>t-3</sub>)</i> | Smooth          |                       | 286.2         | <0.001         |            |
| Tmean4                                                      | <i>Intercept</i>               | -1.40           | 0.06                  |               | <0.001         | 1769       |
|                                                             | <i>s (Tmean<sub>t-4</sub>)</i> | Smooth          |                       | 443.2         | <0.001         |            |

| <b>Models with variable explanatory Temperature maximum</b> |                               |        |      |       |        |      |
|-------------------------------------------------------------|-------------------------------|--------|------|-------|--------|------|
| Tmax                                                        | <i>Intercept</i>              | -0.87  | 0.10 |       | <0.001 | 1916 |
|                                                             | <i>s (Tmax)</i>               | Smooth |      | 26.73 | <0.001 |      |
| Tmax1                                                       | <i>Intercept</i>              | -0.93  | 0.09 |       | <0.001 | 1906 |
|                                                             | <i>s (Tmax<sub>t-1</sub>)</i> | Smooth |      | 43.18 | <0.001 |      |
| Tmax2                                                       | <i>Intercept</i>              | -0.96  | 0.09 |       | <0.001 | 1900 |
|                                                             | <i>s (Tmax<sub>t-2</sub>)</i> | Smooth |      | 54.1  | <0.001 |      |
| Tmax3                                                       | <i>Intercept</i>              | -1.04  | 0.09 |       | <0.001 | 1884 |
|                                                             | <i>s (Tmax<sub>t-3</sub>)</i> | Smooth |      | 85.12 | <0.001 |      |
| Tmax4                                                       | <i>Intercept</i>              | -1.14  | 0.08 |       | <0.001 | 1860 |
|                                                             | <i>s (Tmax<sub>t-4</sub>)</i> | Smooth |      | 140   | <0.001 |      |
| <b>Models with variable explanatory humidity</b>            |                               |        |      |       |        |      |
| Hum                                                         | <i>Intercept</i>              | -0.88  | 0.10 |       | <0.001 | 1923 |
|                                                             | <i>s (Hum)</i>                | Smooth |      | 25.56 | <0.001 |      |
| Hum1                                                        | <i>Intercept</i>              | -0.91  | 0.10 |       | <0.001 | 1916 |
|                                                             | <i>s (Hum<sub>t-1</sub>)</i>  | Smooth |      | 36.32 | <0.001 |      |
| Hum2                                                        | <i>Intercept</i>              | -0.95  | 0.09 |       | <0.001 | 1908 |
|                                                             | <i>s (Hum<sub>t-2</sub>)</i>  | Smooth |      | 51.05 | <0.001 |      |
| Hum3                                                        | <i>Intercept</i>              | -0.980 | 0.09 |       | <0.001 | 1901 |
|                                                             | <i>s (Hum<sub>t-3</sub>)</i>  | Smooth |      | 65.14 | <0.001 |      |
| Hum4                                                        | <i>Intercept</i>              | -0.99  | 0.09 |       | <0.001 | 1898 |
|                                                             | <i>s (Hum<sub>t-4</sub>)</i>  | Smooth |      | 70.67 | <0.001 |      |
| <b>Models with variable explanatory Rain</b>                |                               |        |      |       |        |      |
| Rain                                                        | <i>Intercept</i>              | -0.77  | 0.11 |       | <0.001 | 1937 |
|                                                             | <i>s (Rain)</i>               | Smooth |      | 2.14  | 0.145  |      |
| Rain1                                                       | <i>Intercept</i>              | -0.78  | 0.11 |       | <0.001 | 1934 |
|                                                             | <i>s (Rain<sub>t-1</sub>)</i> | Smooth |      | 6.21  | 0.0162 |      |

|       |                               |        |      |      |        |      |
|-------|-------------------------------|--------|------|------|--------|------|
| Rain2 | <i>Intercept</i>              | -0.77  | 0.11 |      | <0.001 | 1937 |
|       | <i>s (Rain<sub>t-2</sub>)</i> | Smooth |      | 4.54 | 0.135  |      |
| Rain3 | <i>Intercept</i>              | -0.77  | 0.11 |      | <0.001 | 1938 |
|       | <i>s (Rain<sub>t-3</sub>)</i> | Smooth |      | 3.25 | 0.246  |      |
| Rain4 | <i>Intercept</i>              | -0.76  | 0.11 |      | <0.001 | 1938 |
|       | <i>s (Rain<sub>t-4</sub>)</i> | Smooth |      | 2.12 | 0.396  |      |

---
