# Supplementary material for: Meteorological variables and mosquito monitoring are good predictors for infestation trends of Aedes aegypti, the vector of dengue, chikungunya and Zika
Source: PubMed Central journal article supplement (PMC5307865; doi:10.1186/s13071-017-2025-8), 2017-02-13
Supplement: 13071_2017_2025_MOESM3_ESM.pdf [file 13071_2017_2025_MOESM3_ESM.pdf]

**Table S2: Comparison of discarded models**

| <b>Model</b>                                                                                 | <b>AIC</b> |
|----------------------------------------------------------------------------------------------|------------|
| glm(Aaefem ~ offset(INtraps) + Tmin <sub>t-4</sub> + Hum <sub>t-4</sub> , family = poisson)  | 17337      |
| glm(Aaefem ~ offset(INtraps) + Tmin <sub>t-4</sub> + MFAI <sub>t-1</sub> , family = poisson) | 11180      |
| glm.nb(Aaefem ~ offset(INtraps) + Tmin <sub>t-4</sub> + MFAI <sub>t-1</sub> )                | 1737       |
| glm.nb(Aaefem ~ offset(INtraps) + Tmin <sub>t-4</sub> + Hum <sub>t-4</sub> )                 | 1763       |
| gam(Aaefem~offset(INtraps)+s(Tmin <sub>t-4</sub> )+s(Hum <sub>t-4</sub> ), family=poisson)   | 10159      |
| gam(Aaefem~offset(INtraps)+s(Tmin <sub>t-4</sub> )+s(MFAI <sub>t-1</sub> ), family=poisson)  | 4411       |
| gam(Aaefem~offset(INtraps)+s(Tmin <sub>t-4</sub> , Hum <sub>t-4</sub> ), family=nb())        | 1736       |
| gam(Aaefem~offset(INtraps)+s(Tmin <sub>t-4</sub> , MFAI <sub>t-1</sub> ), family=nb())       | 1692       |
