# Supplementary material for: Meteorological variables and mosquito monitoring are good predictors for infestation trends of Aedes aegypti, the vector of dengue, chikungunya and Zika
Source: PubMed Central journal article supplement (PMC5307865; doi:10.1186/s13071-017-2025-8), 2017-02-13
Supplement: 13071_2017_2025_MOESM4_ESM.pdf [file 13071_2017_2025_MOESM4_ESM.pdf]

**Table S3: Comparison of AICs of logistic regression models with MFAI as predictor variable in varying time lags**

Formula:  $\text{glm}(\text{pDenA} \sim \text{MFAI}, \text{family} = \text{binomial})$

| <b>Model</b>        | <b>AIC</b> | <b>P-value</b> |
|---------------------|------------|----------------|
| MFAI                | 146.7      | <0.001         |
| MFAI <sub>t-1</sub> | 147.1      | <0.001         |
| MFAI <sub>t-2</sub> | 145.7      | <0.001         |
| MFAI <sub>t-3</sub> | 137.9      | <0.001         |
| MFAI <sub>t-4</sub> | 141.4      | <0.001         |

Abbreviations: pDenA- presence of dengue case, MFAI - mean female Aedes Index
