# Supplementary material for: Meteorological variables and mosquito monitoring are good predictors for infestation trends of Aedes aegypti, the vector of dengue, chikungunya and Zika
Source: PubMed Central journal article supplement (PMC5307865; doi:10.1186/s13071-017-2025-8), 2017-02-13
Supplement: 13071_2017_2025_MOESM5_ESM.pdf [file 13071_2017_2025_MOESM5_ESM.pdf]

**Table S4: Descriptive statistics by year.**

| <b>Year</b>  |      | <b>Rain</b> | <b>Humidity</b> | <b>Tmean</b> | <b>Tmax</b> | <b>Tmin</b> | <b>MFAI</b> | <b><i>Aedes aegypti</i><br/>(Female)</b> |
|--------------|------|-------------|-----------------|--------------|-------------|-------------|-------------|------------------------------------------|
| <b>2012*</b> | Min  | 0           | 62.3            | 15.7         | 22.2        | 10.7        | 0.03        | 16                                       |
|              | Mean | 3.5         | 70.1            | 22.7         | 29.3        | 17.9        | 0.27        | 184.7                                    |
|              | Max  | 10.8        | 80.6            | 27           | 34.1        | 21.4        | 0.62        | 407                                      |
|              | Sd   | 3.5         | 5.9             | 2.9          | 3.4         | 2.5         | 0.22        | 149                                      |
| <b>2013</b>  | Min  | 0           | 62.4            | 8.9          | 14.8        | 4.9         | 0           | 0                                        |
|              | Mean | 2.6         | 76.2            | 19.3         | 25.2        | 15.2        | 0.32        | 226.8                                    |
|              | Max  | 23          | 89.3            | 26.9         | 34.3        | 22.5        | 1.2         | 891                                      |
|              | Sd   | 4.8         | 6.3             | 4.4          | 4.9         | 4.1         | 0.36        | 258                                      |
| <b>2014</b>  | Min  | 0           | 61.4            | 12.5         | 14.2        | 8.2         | 0.01        | 5                                        |
|              | Mean | 4.6         | 77.9            | 20.4         | 24.9        | 17.1        | 0.4         | 290.2                                    |
|              | Max  | 18.9        | 91.1            | 30.7         | 38          | 24.5        | 1.2         | 909                                      |
|              | Sd   | 4.4         | 6.3             | 4.5          | 5.2         | 4.2         | 0.35        | 254                                      |
| <b>2015</b>  | Min  | 0           | 68              | 11.8         | 14.1        | 9.5         | 0.07        | 51                                       |
|              | Mean | 3.8         | 77.3            | 21.7         | 25.3        | 18.6        | 1           | 722                                      |
|              | Max  | 15.7        | 88.5            | 26.8         | 31.2        | 23.8        | 1.7         | 1252                                     |
|              | Sd   | 3.5         | 4.5             | 4            | 5.1         | 3.4         | 0.48        | 345                                      |
| <b>2016*</b> | Min  | 0.04        | 71.2            | 25.4         | 30.5        | 21.7        | 0.8         | 674                                      |
|              | Mean | 0.25        | 73.4            | 25.8         | 31.7        | 22          | 1.1         | 950.5                                    |
|              | Max  | 0.46        | 75.5            | 26.2         | 32.9        | 22.2        | 1.5         | 1227                                     |
|              | Sd   | 0.29        | 3               | 0.6          | 1.7         | 0.37        | 0.4         | 391                                      |

\* The year 2012 includes only data from September onwards, and year 2016 includes only data until January.
