# Supplementary material for: Meteorological variables and mosquito monitoring are good predictors for infestation trends of Aedes aegypti, the vector of dengue, chikungunya and Zika
Source: PubMed Central journal article supplement (PMC5307865; doi:10.1186/s13071-017-2025-8), 2017-02-13
Supplement: 13071_2017_2025_MOESM6_ESM.pdf [file 13071_2017_2025_MOESM6_ESM.pdf]

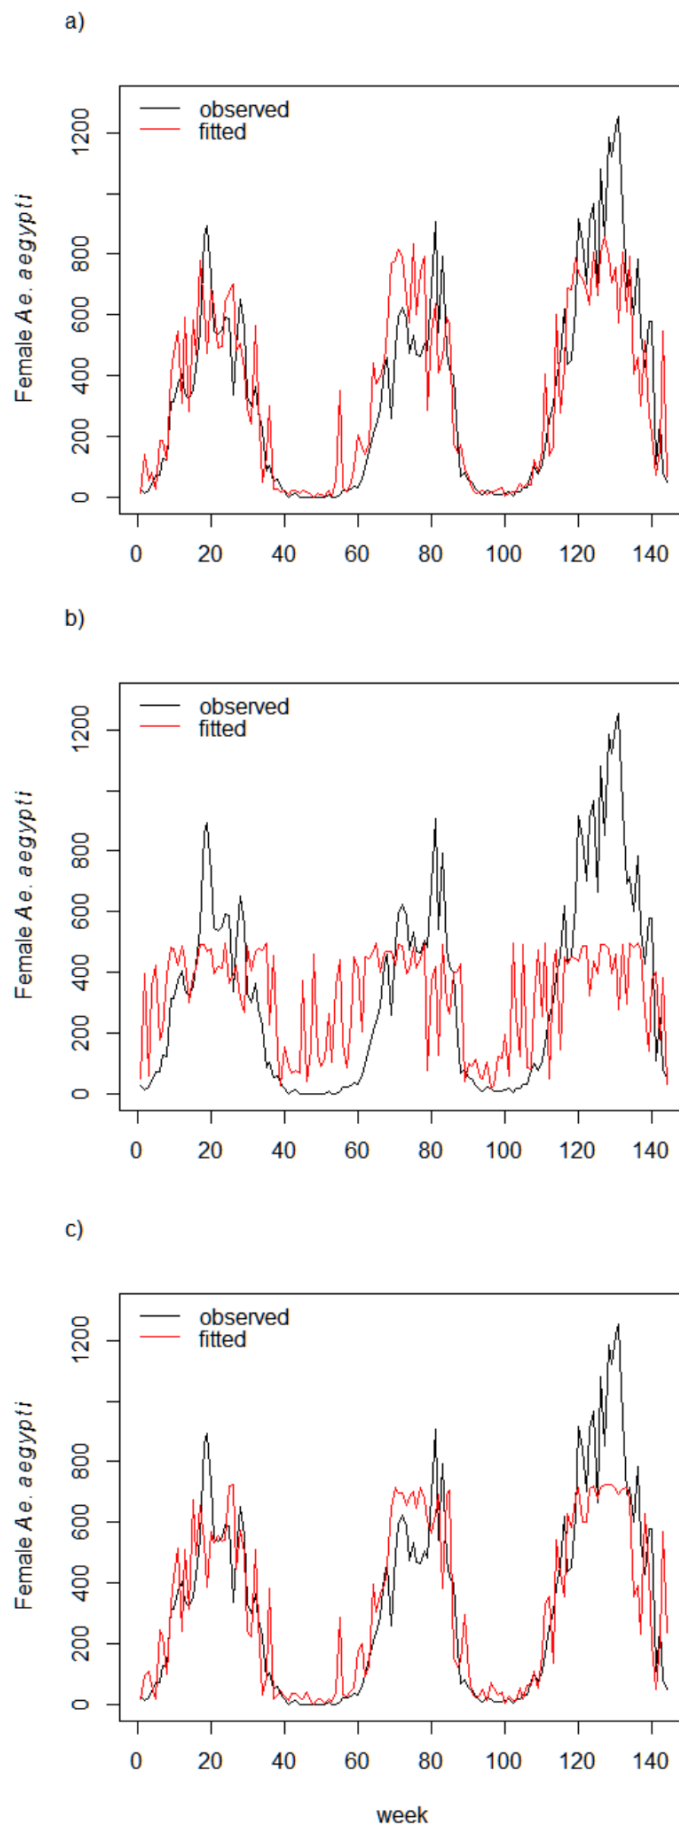

Figure S2: Observed and fitted by model: **a** gam ( $A_{efem} \sim \text{offset}(IN_{traps}) + s(T_{min4}) + s(hum4)$ , family=nb ()), **b** gam ( $A_{efem} \sim \text{offset}(IN_{traps}) + s(hum4)$ , family=nb ()), **c** gam ( $A_{efem} \sim \text{offset}(IN_{traps}) + s(T_{min4})$ , family=nb ())
